# Supplementary material for: Molecular determinants of Guanylate Cyclase Activating Protein subcellular distribution in photoreceptor cells of the retina
Source: PubMed Central journal article supplement (PMC5811540; doi:10.1038/s41598-018-20893-1), 2018-02-13

## **SUPPLEMENTARY MATERIAL**

**TITLE:** Molecular determinants of Guanylate Cyclase Activating Protein subcellular distribution in photoreceptor cells of the retina.

**Authors:** Santiago López-Begines<sup>1</sup>, Anna Plana-Bonamaisó<sup>2</sup>, Ana Méndez<sup>1,2\*</sup>.

**Affiliations:** <sup>1</sup>Bellvitge Biomedical Research Institute (IDIBELL), Barcelona, Spain.  
<sup>2</sup>Department of Physiology, University of Barcelona School of Medicine-Bellvitge Health Science Campus, Barcelona, Spain.

**Supplementary Figure S1.** Subcellular distribution of GCAP1 in individual rod photoreceptor cells of GCAP1/2 knockout mice transfected with the wildtype GCAP1 construct. Cells that were taken into account for determination of GCAP1 distribution to rod outer segments are numbered. The cells presented in Fig 1 of the main text of the article are not included here, and hence the discontinued numbering. OS: outer segment; IS: inner segment.

# WT/GCAP1

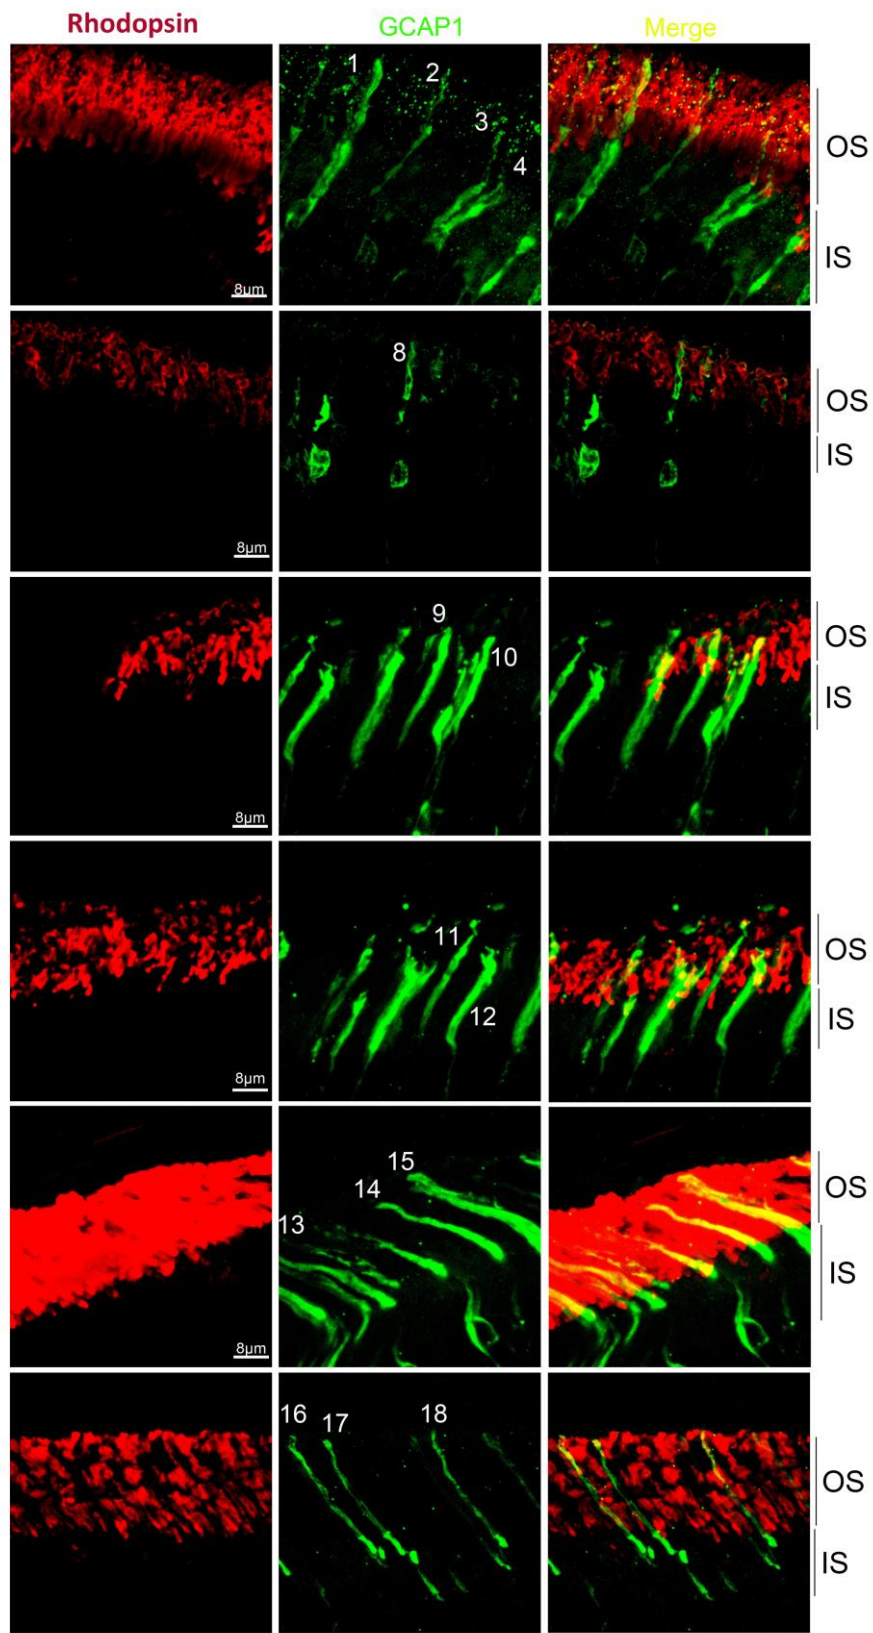

**Supplementary Figure S2.** Subcellular distribution of K23D/GCAP1 in individual rod photoreceptor cells of GCAP1/2 knockout mice transfected with the K23D/GCAP1 construct. The cells that were taken into account for determination of GCAP1 distribution to rod outer segments are numbered. The cells presented in Fig 1 of the main text of the article are not included here, and hence the discontinued numbering. OS: outer segment; IS: inner segment.

# K23D/GCAP1

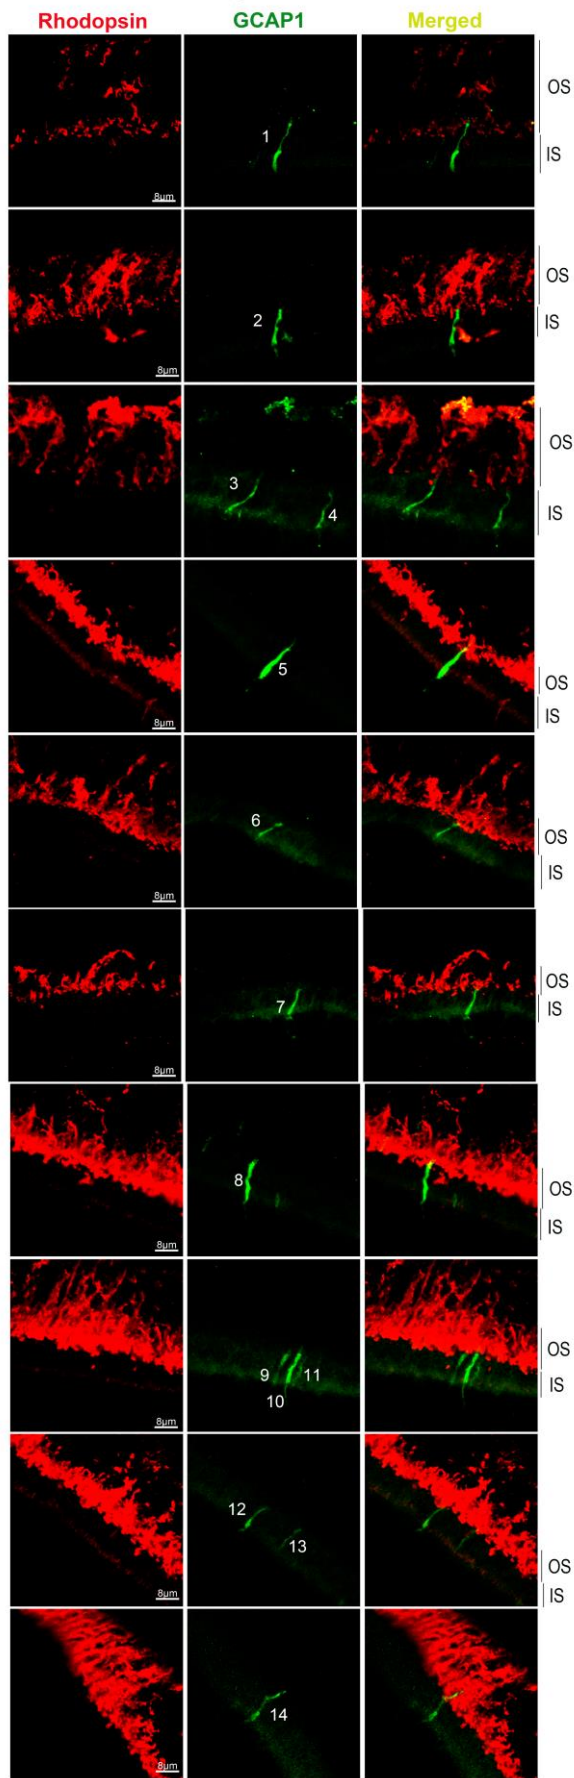

IS OS

**Supplementary Figure S3.** Subcellular distribution of W94A/GCAP1 in individual rod photoreceptor cells of GCAP1/2 knockout mice transfected with the W94A/GCAP1 construct. Cells that were taken into account for determination of GCAP1 distribution to rod outer segments are numbered. The cells presented in Fig 1 of the main text of the article are not included here, and hence the discontinued numbering. OS: outer segment; IS: inner segment.

# W94A/GCAP1

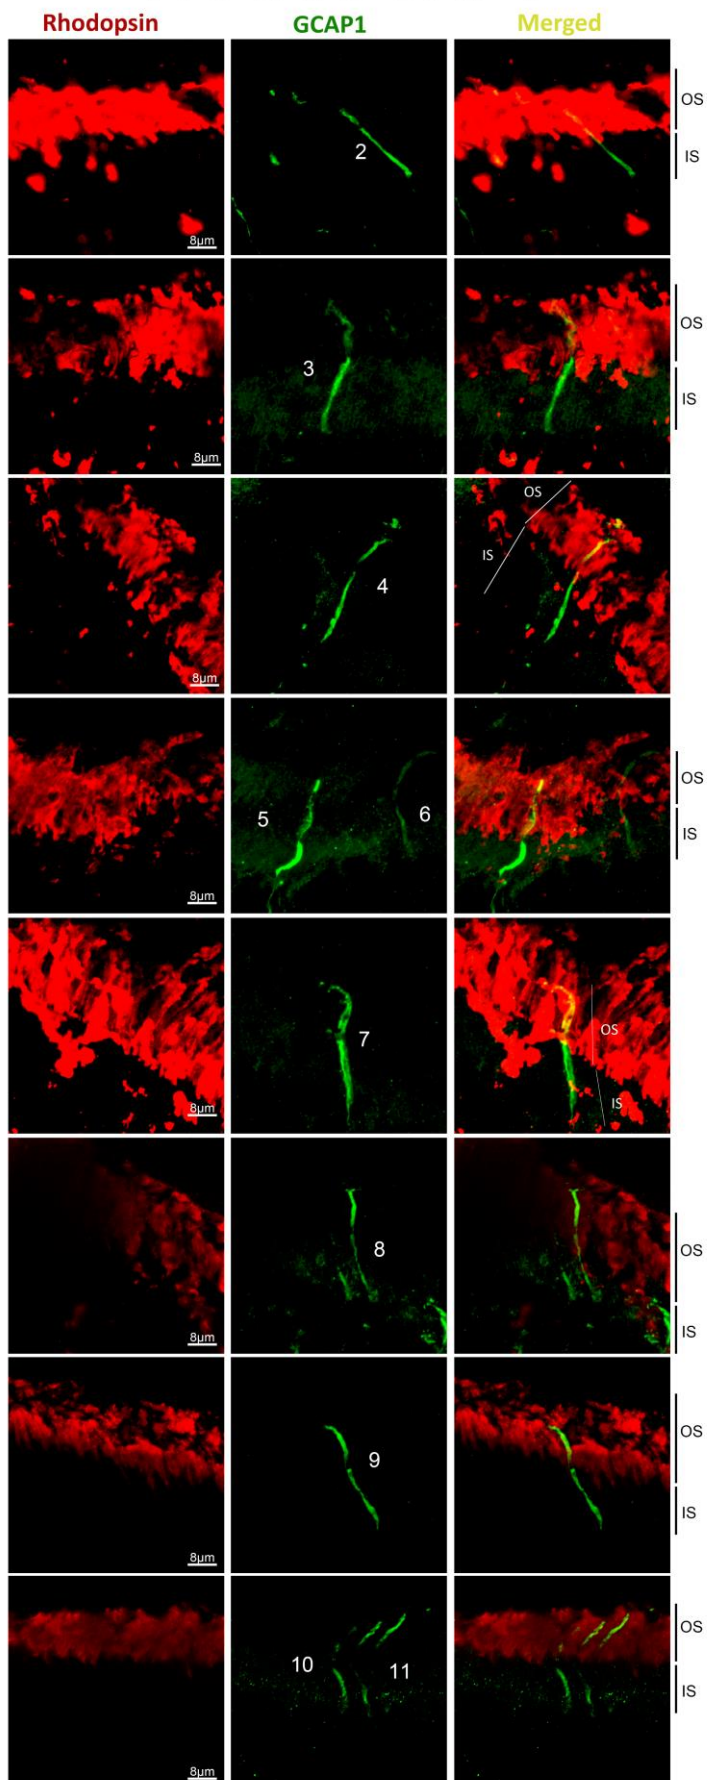

**Supplementary Figure S4.** Subcellular distribution of G2A/GCAP1 in individual rod photoreceptor cells of GCAP1/2 knockout mice transfected with the G2A/GCAP1 construct. The cells that were taken into account for determination of GCAP1 distribution to rod outer segments are numbered. The cells presented in Fig 1 of the main text of the article are not included here, and hence the discontinued numbering. OS: outer segment; IS: inner segment.

# G2A/GCAP1

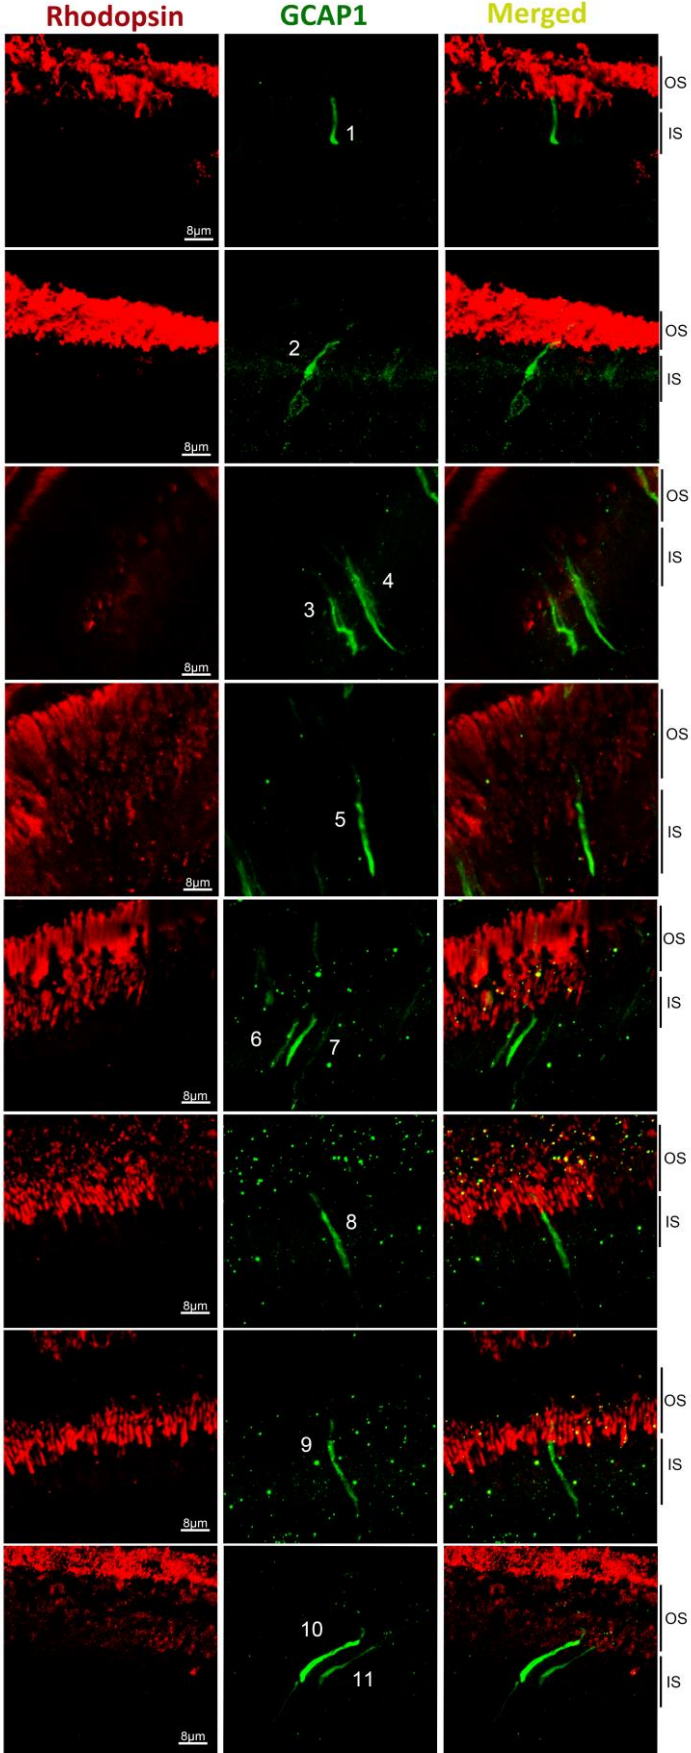



**Supplementary Figure S5.** Subcellular distribution of GCAP2 in individual rod photoreceptor cells of GCAP1/2 knockout mice transfected with wildtype GCAP2. Cells that were taken into account for determination of GCAP2 distribution to rod outer segments are numbered. The cells that are presented in Fig 2 of the main text of the article are not included here, and hence the discontinued numbering. OS: outer segment; IS: inner segment.

WT/GCAP2

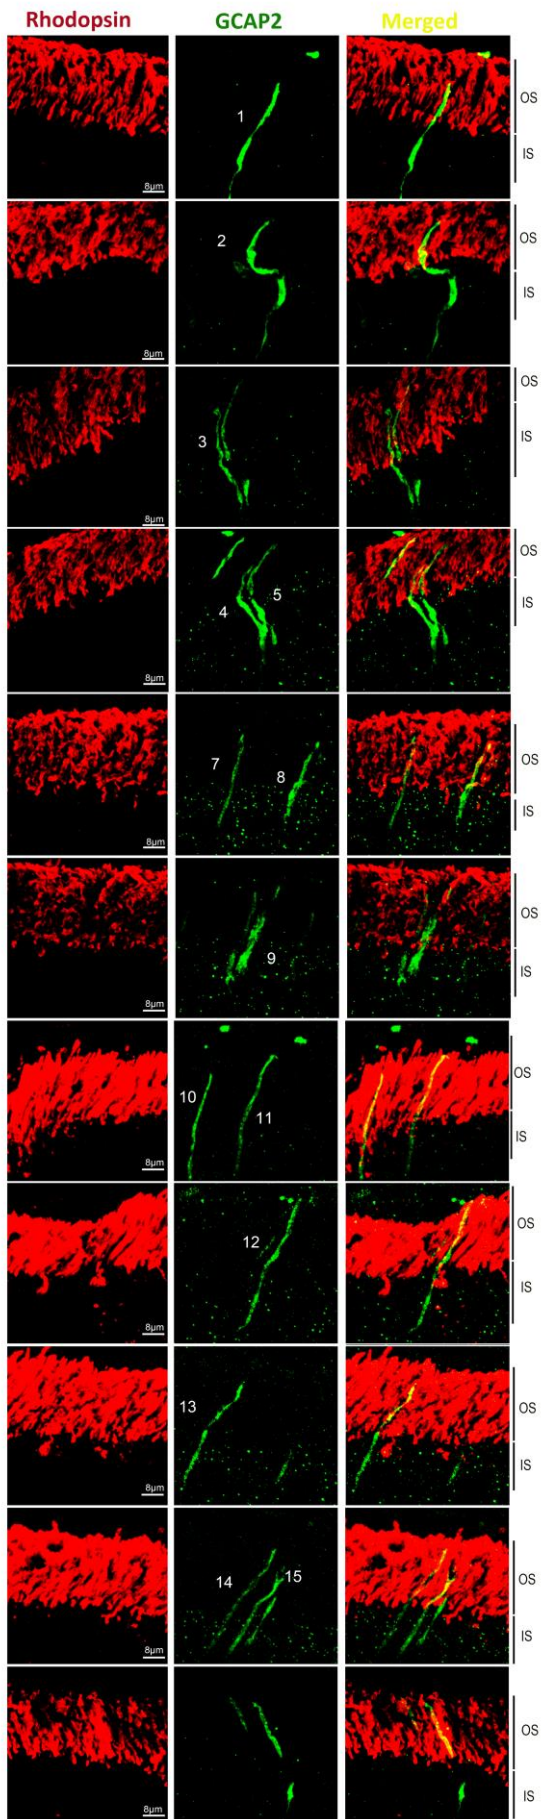

**Supplementary Figure S6.** Subcellular distribution of GCAP2 in individual rod photoreceptor cells of GCAP1/2 knockout mice transfected with constructs G2A/GCAP2; S201D/GCAP2; or S201G/GCAP2. Cells that were taken into account for determination of GCAP2 distribution to rod outer segments are numbered. The cells that are presented in Fig 2 of the main text of the article are not included here, and hence the discontinued numbering. OS: outer segment; IS: inner segment.

### G2A/GCAP2

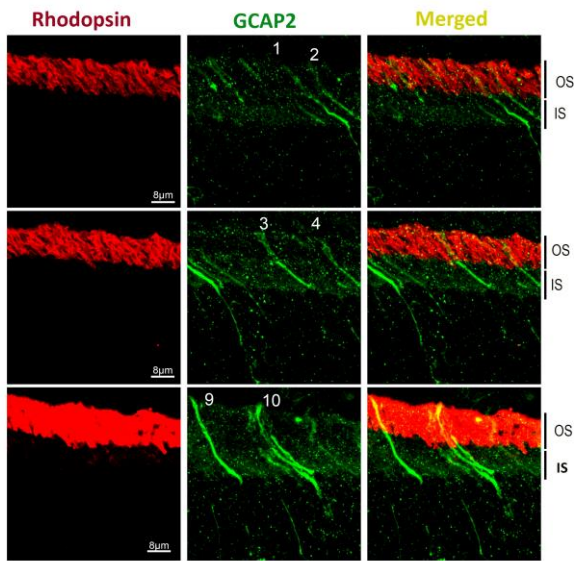

### S201D/GCAP2

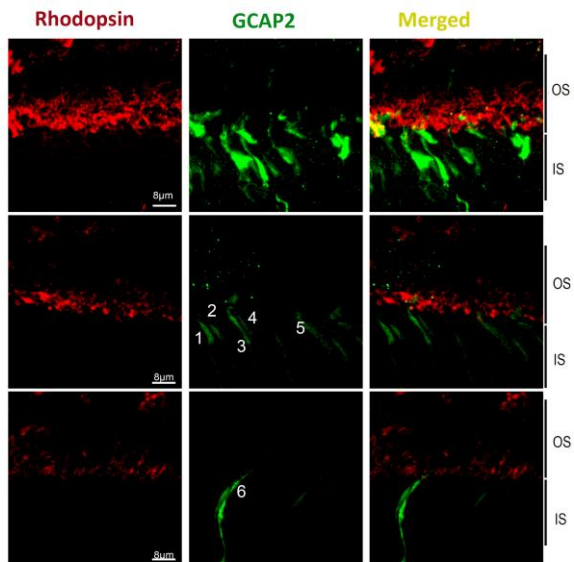

### S201G/GCAP2

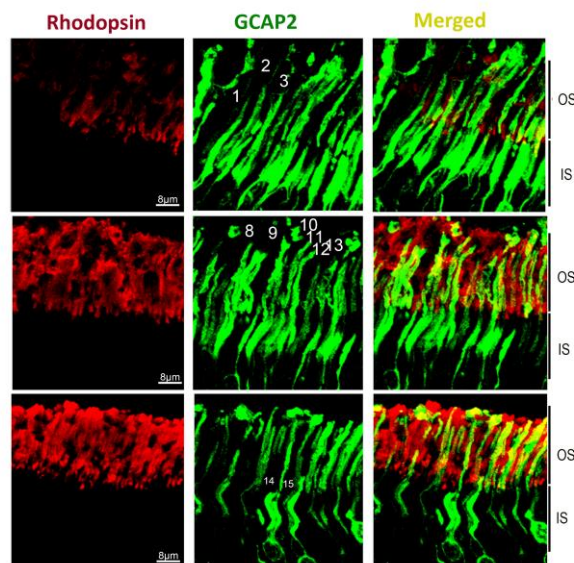

**Supplementary Figure S7.** Subcellular distribution of GCAP1 in individual rod photoreceptor cells of GCAP1/2 knockout mice transfected with P50L/GCAP1 construct. The cells that were taken into account for determination of GCAP1 distribution to rod outer segments are numbered. The cells that are presented in Fig 3 of the main text of the article are not included here, and hence the discontinued numbering. OS: outer segment; IS: inner segment.

# P50L/GCAP1

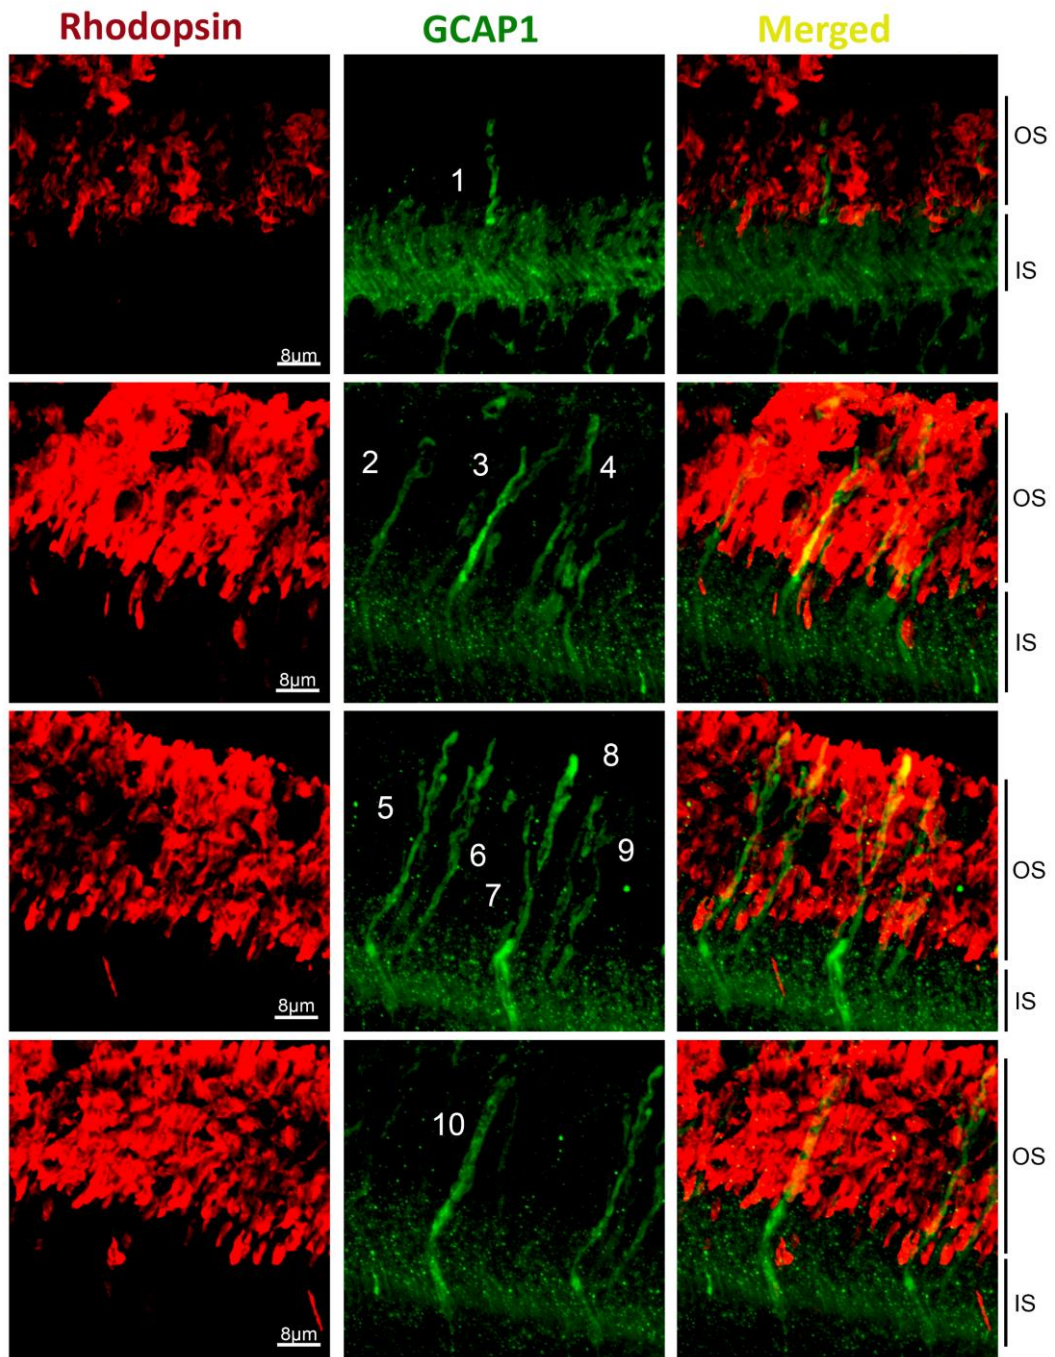

**Supplementary Figure S8.** Subcellular distribution of GCAP2 in individual rod photoreceptor cells of GCAP1/2 knockout mice transfected with bG161R/GCAP2. The cells that were taken into account for determination of GCAP2 distribution to rod outer segments are numbered. The cells that are presented in Fig 4 of the main text of the article are not included here, and hence the discontinued numbering. OS: outer segment; IS: inner segment.

# G161R/GCAP2

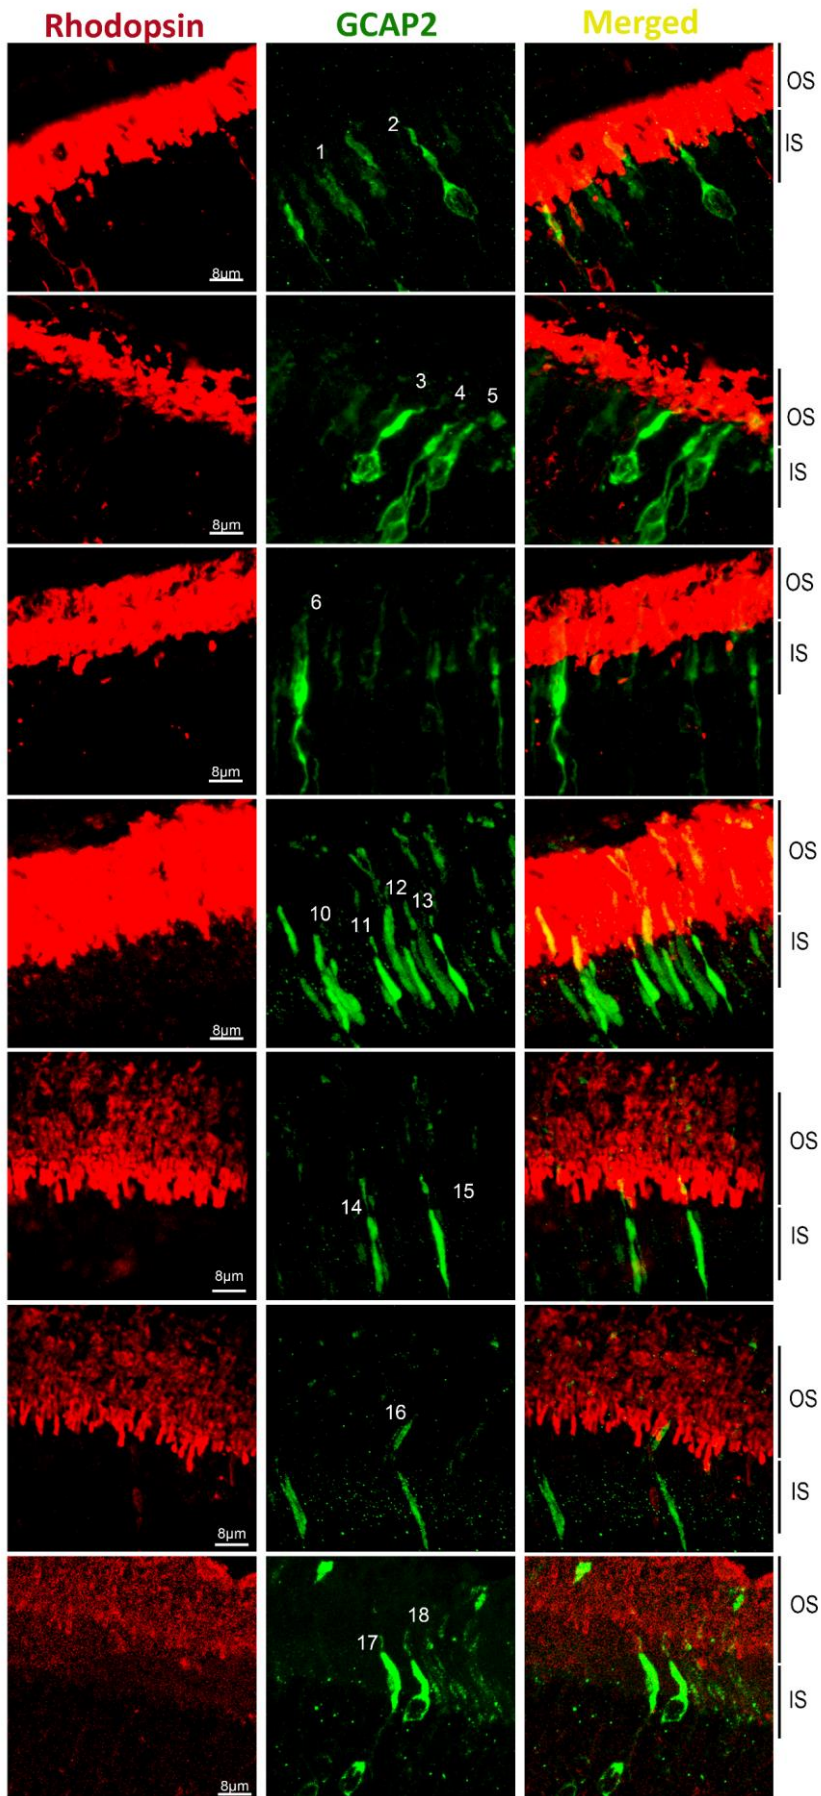

Supplement: 41598_2018_20893_MOESM1_ESM.pdf [file 41598_2018_20893_MOESM1_ESM.pdf]
